# Supplementary material
Source: PubMed Central journal article supplement (PMC3169829)
Supplement: mmc1.pdf [file mmc1.pdf]

The American Journal of Human Genetics, Volume 89

Supplemental Data

## **Mutations of *POLR3A* Encoding a Catalytic Subunit**

### **of RNA Polymerase Pol III Cause a Recessive**

### **Hypomyelinating Leukodystrophy**

Geneviève Bernard, Eliane Chouery, Maria Lisa Putorti, Martine Tétreault, Asako Takanohashi, Giovanni Carosso, Isabelle Clément, Odile Boespflug-Tanguy, Diana Rodriguez, Valérie Delague, Joelle Abou Ghoch, Nadine Jalkh, Imen Dorboz,<sup>7,8</sup> Sebastien Fribourg, Martin Teichmann, André Megarbane, Raphael Schiffmann, Adeline Vanderver, and Bernard Brais

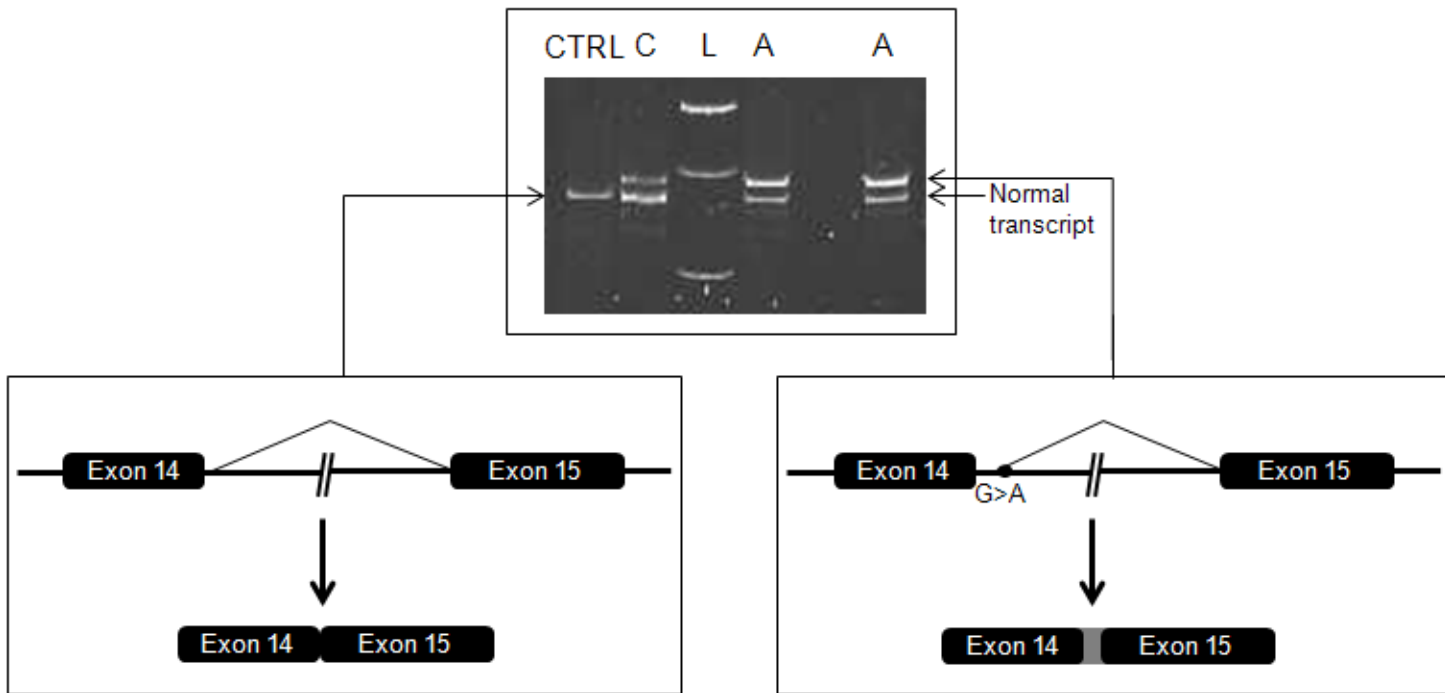

**Figure S1.** Splice Site Mutation c.2003+18G>A

Legend: Agarose gel of the amplification of cDNA of a control (CTRL), a carrier (C) and two affected individuals (A) homozygous for the splice site mutation c.2003+18G>A. The G to A substitution creates a new donor splice site, causing the retention of 19 nucleotides from intron 14. In the homozygous participants, cDNA amplification revealed that both the normal allele and the allele with aberrant splicing were produced. These results were proven by cDNA sequencing. A: Affected, C: Carrier, CTRL: Control, L: Ladder.

**Table S1. POLR3A Gene Primers**

| NAME                   | EXON(S) | PRIMER                     | PRODUCT SIZE (bp) |
|------------------------|---------|----------------------------|-------------------|
| POLR3A_redo-exon1-F    | 1       | CTTCCAGTAAGCGCCACCA        | 464               |
| POLR3A_redo-exon1-R    |         | ACCAACGCTGGTAGTTCTGG       |                   |
| POLR3A_exon2-3-F       | 2 - 3   | GGTAGGAAAAGCCAGTGGAG       | 890               |
| POLR3A_exon2-3-R       |         | CTTGAGTGATTTAACGTAGTGTGAG  |                   |
| POLR3A_exon4-F         | 4       | TGGTCACGTGGTTAAGGGTA       | 374               |
| POLR3A_exon4-R         |         | GAAAAGCTGACTCCCGAACA       |                   |
| POLR3A_exon4-5-F       | 4 - 5   | AACACAGGCTTCCTCTCTGC       | 887               |
| POLR3A_exon4-5-R       |         | CTGGACCTCTCATTTTGGAAAG     |                   |
| POLR3A_exon5-F         | 5       | GGGAAACGGACCTCTCATCT       | 399               |
| POLR3A_exon5-R         |         | TTTTGGAAGAAAGTGGGTGTC      |                   |
| POLR3A_exon6-7-F       | 6 - 7   | CAATTTTAAGGCTCTTGCAGC      | 822               |
| POLR3A_exon6-7-R       |         | TGTGCTCATGGGAACAATAAG      |                   |
| POLR3A_exon8-F         | 8       | ACAAGATGTGCAGAAGCCAG       | 425               |
| POLR3A_exon8-R         |         | AACCAAACGTGGGTTGAGTG       |                   |
| POLR3A_redo-1exon8-F   | 8       | CCGTTCTTATTGTTCCCATGA      | 299               |
| POLR3A_redo-1exon8-R   |         | GGGGACTTTCTACTGCCTGTT      |                   |
| POLR3A_redo-2exon8-F   | 8       | CAGGCTTTCCTCAGTCTCTCC      | 299               |
| POLR3A_redo-2exon8-R   |         | TTGTTGCAATACCAAATAACG      |                   |
| POLR3A_exon9-F         | 9       | CCAGGATGCCTCTCTTTCTC       | 387               |
| POLR3A_exon9-R         |         | AATGACATACCTTGGCTCAG       |                   |
| POLR3A_redo-2exon10-F  | 10      | TGTTGCCAGTCTGTTCTCA        | 669               |
| POLR3A_redo-2exon10-R  |         | CCGTGGTCCCAGCTACTTT        |                   |
| POLR3A_exon11-F        | 11      | GACTGGGAATGAGTCCTAAATG     | 439               |
| POLR3A_exon11-R        |         | TTTAAGAACAGAAAGAGCCTGG     |                   |
| POLR3A_exon12-F        | 12      | TCATTTCTCAGCCTCGTCTT       | 295               |
| POLR3A_exon12-R        |         | TTAAATAGCTTTTCAAGTCATCACA  |                   |
| POLR3A_exon12-13-F     | 12 - 13 | CAGCCTCGTCTTCTGTCTAC       | 973               |
| POLR3A_exon12-13-R     |         | GAAGCCTGAGAGTCAGTGGG       |                   |
| POLR3A_exon13-F        | 13      | GCAGCTGTTGTTTCAATTAC       | 397               |
| POLR3A_exon13-R        |         | GGTCTCAATCCCCCTCAGT        |                   |
| POLR3A_exon14-F        | 14      | TTGTGTGTTGGTGCACAGG        | 439               |
| POLR3A_exon14-R        |         | TCCACCTAAGGCTTACAGAAAC     |                   |
| POLR3A_exon15-F        | 15      | TCCAAGTTTTCTTTAACC         | 493               |
| POLR3A_exon15-R        |         | GCACACATGATTTAGCCTGG       |                   |
| POLR3A_exon16-F        | 16      | TGAATTGTGATGAATTCTGTGAAG   | 473               |
| POLR3A_exon16-R        |         | AACAGGACAGACGCCAATG        |                   |
| POLR3A_exon17-F        | 17      | TTTACTGATCGGAAATCGGG       | 412               |
| POLR3A_exon17-R        |         | CTTCAAAGCAGTTAAACTTCCC     |                   |
| POLR3A_exon18-F        | 18      | TGTTCCAGGACCATGACCTC       | 416               |
| POLR3A_exon18-R        |         | CATGAGACACTGTGCCCG         |                   |
| POLR3A_exon19-F        | 19      | GGGCAAAGAAAGCCTGC          | 438               |
| POLR3A_exon19-R        |         | TTCCAGGGCATCTACCTTTC       |                   |
| POLR3A_exon20-F        | 20      | TGTTCTTGGGGTGAGAGGAC       | 469               |
| POLR3A_exon20-R        |         | AAAGATACTAATCCAGTGCTTGGG   |                   |
| POLR3A_exon21-F        | 21      | AAAATCACAGGTTGCTAAAAGC     | 383               |
| POLR3A_exon21-R        |         | GGCCATCTTTGAACTTTCTAAC     |                   |
| POLR3A_exon22-23-F     | 22-23   | GAAGCAGTATCCAGATTGGGTC     | 554               |
| POLR3A_exon22-23-R     |         | CCCCTACAGAAAATGTGACAG      |                   |
| POLR3A_exon24-F        | 24      | CCCTTCCGACCCTAATAGC        | 423               |
| POLR3A_exon24-R        |         | CATGCCACCCAGAGTTTAAG       |                   |
| POLR3A_exon25-26-F     | 25-26   | GCTCAGTAAACTGGGGTTGC       | 668               |
| POLR3A_exon25-26-R     |         | TTAGAAAGAAAATGTGAGGGG      |                   |
| POLR3A_exon27-F        | 27      | GCATATTTATGGTATTAATTCATGGT | 497               |
| POLR3A_exon27-R        |         | GGGACTGCACCTCATCTAA        |                   |
| POLR3A_redo-exon28-F   | 28      | GGCCTTATCCCCAAGGAGT        | 574               |
| POLR3A_redo-exon28-R   |         | CAGAGCTTGCAGTGAGCA         |                   |
| POLR3A_redo-2exon28-F  | 28      | AAAGCTGGGGTGATCAAGGT       | 300               |
| POLR3A_redo-2exon28-R  |         | CAGATGGCACAAGGAAGACA       |                   |
| POLR3A_exon29-F        | 29      | ATCCATTTCTGGAAAACGGC       | 420               |
| POLR3A_exon29-R        |         | GCCTGACCAGCATACTTTGG       |                   |
| POLR3A_exon30-F        | 30      | GCCTTTCACACCTGACGTTG       | 409               |
| POLR3A_exon30-R        |         | CCAGCAGTTCCAATTCGTG        |                   |
| POLR3A_exon31_1-F      | 31      | ATGGGAAGGAAAGGGATTTG       | 978               |
| POLR3A_exon31_1-R      |         | ATGTTACAGAGCTGCCTGGG       |                   |
| POLR3A_redo-exon31_2-F | 31      | ACACACTGCTTCCCTGGACT       | 685               |
| POLR3A_redo-exon31_2-R |         | GGAAGGGAAGCACTCATTTC       |                   |
| POLR3A_exon31_3-F      | 31      | GGAAGCCTCACTGGAGTTTG       | 680               |
| POLR3A_exon31_3-R      |         | CCACACTGATACCCCAAG         |                   |

Legend: This Table lists all primers used to sequence the 31 exons of *POLR3A*. Abbreviations used: bp: base pairs, F: forward, R: reverse.
